# Supplementary material
Source: PubMed Central journal article supplement (PMC4124642)
Supplement: NIHMS439914-supplement-1.pdf [file NIHMS439914-supplement-1.pdf]

## **ONLINE SUPPLEMENT**

### **Minimally Invasive Surgery plus rt-PA for Intracerebral Hemorrhage Evacuation (MISTIE) Decreases Perihematomal Edema**

W. Andrew Mould, B.A.\*<sup>1</sup>, J. Ricardo Carhuapoma, M.D.\*<sup>2</sup>, John Muschelli, ScM<sup>3</sup>, Karen Lane, C.C.R.P.<sup>1</sup>, Timothy C Morgan, M.P.H.<sup>1</sup>, Nichol A McBee, M.P.H.<sup>1</sup>, Amanda J Bistran-Hall, B.S.<sup>1</sup>, Natalie L Ullman, B.S.<sup>1</sup>, Paul Vespa, M.D.<sup>4</sup>, Neil A Martin, M.D.<sup>4</sup>, Issam Awad, M.D.<sup>5</sup>, Mario Zuccarello, M.D.<sup>6</sup>, Daniel F. Hanley, M.D.<sup>1</sup> For the MISTIE investigators.

\* authors contributed equally

<sup>1</sup>Department of Neurology, Division of Brain Injury Outcomes, Johns Hopkins Medical Institutions, Baltimore, MD

<sup>2</sup>Departments of Neurology, Neurosurgery and Anesthesiology/Critical Care Medicine, Johns Hopkins Medical Institutions, Baltimore, MD

<sup>3</sup>Department of Biostatistics, Johns Hopkins Bloomberg School of Public Health, Baltimore, MD

<sup>4</sup>Departments of Neurology and Neurosurgery, UCLA School of Medicine, Los Angeles, CA

<sup>5</sup>Department of Neurosurgery, University of Chicago Medicine and Biological Sciences, Chicago, IL

<sup>6</sup>Department of Neurosurgery, University of Cincinnati, Cincinnati, OH

**Cover Title:** Perihematomal Edema following MISTIE

**Key words:** Intracerebral hemorrhage, Thrombolysis; rt-PA, Clot aspiration, Minimally Invasive Surgery, Brain edema, MISTIE

**Subject Codes:** Intracerebral Hemorrhage, Thrombolysis, Computerized Tomography and Magnetic Resonance Imaging

**Figures:** 4

**Tables:** 2

**Word Count:** 5,373

Corresponding Author:

J. Ricardo Carhuapoma, M.D.

The Johns Hopkins Hospital

600 N Wolfe Street / Meyer 8-140

Baltimore, MD 21287

Phone: (410) 955 7481

Fax: (410) 614 7981

E-mail: [jcarhua1@jhmi.edu](mailto:jcarhua1@jhmi.edu)

## Online Supplement

### Inclusion criteria:

- 1 Age 18 - 80
- 2 GCS  $\leq$  14 or NIHSS  $\geq$  6
- 3 Spontaneous supratentorial ICH  $\geq$  20cc
- 4 Stable clot (increase no greater than 5cc) at second CT scan done six hours later
- 5 First dose given within 54 hrs. of the initial CT scan
- 6 Symptoms less than 12 hours prior to diagnostic CT scan
- 7 SBP < 200 mmHg or MAP <130 mmHg over 6 hours
- 8 Historical Rankin score of 0 or 1
- 9 Negative pregnancy test

### Exclusion criteria:

- 1 Infratentorial hemorrhage
- 2 Platelet count < 100,000, INR > 1.3, or an elevated PT or APTT
- 3 Pre-existing irreversible coagulopathy
- 4 Any concurrent serious illnesses that would interfere with the safety assessments
- 5 Patients with a mechanical cardiac valve
- 6 Patients with unstable mass or evolving intracranial compartment syndrome
- 7 Ruptured aneurysm, AVM, vascular anomaly, Moyamoya disease
- 8 Irreversibly impaired brainstem function, GCS less than or equal to 4
- 9 Obstructive intraventricular hemorrhage requiring external ventricular drainage
- 10 Internal bleeding, involving retroperitoneal sites, or the gastrointestinal, genitourinary, or respiratory tracts
- 11 Superficial or surface bleeding, observed mainly at vascular puncture and access sites or site of recent surgical intervention
- 12 Known risk for embolization, including history of left heart thrombus, mitral stenosis with atrial fibrillation, acute pericarditis, or subacute bacterial endocarditis
- 13 In the investigator's opinion, the patient is unstable and would benefit from a specific intervention rather than supportive care or MIS + tPA removal of the ICH
- 14 Prior enrollment in the study
- 15 Any other condition that the investigator believes would pose a significant hazard to the subject if the investigational therapy were initiated
- 16 Participation in another simultaneous trial of ICH treatment

### *Operative technique*

For enrolled patients randomized to surgery, a 14-French cannula was stereotactically placed into the center of the parenchymal clot two-thirds the length of the long axis, and within the middle one-third of the clot. Directly after cannula placement, an initial aspiration of clot was conducted using a 10 cc syringe until the surgeon notes resistance to free-hand suction. Following completion of hematoma aspiration, a soft ventriculostomy catheter was then passed through the rigid cannula and the rigid cannula was removed leaving the soft catheter in the center of the residual hematoma. A postoperative CT scan was taken to confirm accurate placement and check for any instance of new bleeding.
